# Supplementary material
Source: publisher site journal article supplement (https://www.dovepress.com/article/369346)
Supplement: Supplementary file 1 [file get_supplementary_file.php]

**Supplemental Table 1:** Survey of 13 experienced FUE practitioners’ scores of skin firmness/thickness and hair shaft type as contributors to the difficulty of FUE on a scale of 1–6.

| Scorer | **1** | **2** | **3** | **4** | **5** | **6** | ***7*** | **8** | **9** | **10** | **11** | **12** | **13** |  |
| --- | --- | --- | --- | --- | --- | --- | --- | --- | --- | --- | --- | --- | --- | --- |
| *Skin Firmness and Thickness* | | | | | | | | | | | | | | |
| Medium | 2 | 1 | 4 | 3 | 1 | 1 | 2 | 2 | 2 | 1 | 2 | 1 | 3 |  |
| Thin | 5 | 5 | 3 | 2 | 5 | 3 | 2 | 4 | 3 | 2 | 2 | 3 | 4 |  |
| Thick | 4 | 6 | 4 | 5 | 6 | 4–5 | 3 | 5 | 4 | 2 | 6 | 6 | 5 |  |
| *Hair Shaft Type* | | | | | | | | | | | | | | |
| Types 1–2 | 1 | 1 | 5 | 2 | 1 | 1–2 | 2 | 2 | 1 | 1 | 2 | 1 | 2 |  |
| Type 3 | 4 | 3 | 4 | 4 | 5 | 4 | 4 | 4 | 3 | 3 | 4 | 2 | 4 |  |
| Type 4 | 6 | 6 | 4 | 6 | 6 | 5–6 | 6 | 6 | 6 | 4 | 6 | 4 | 5 |  |

**Note:** A score of 1 means the feature contributes least to FUE difficulty, whereas a score of 6 means it contributes the most.

**Abbreviation:** FUE, follicular unit excision.
